# Supplementary material
Source: PubMed Central journal article supplement (PMC9429792)
Supplement: mmc1.pdf [file mmc1.pdf]

**Title: Side Effects of COVID-19 Vaccines and Perceptions about COVID-19 and Its Vaccines in Bangladesh**

| Section A  | Eligibility/Basic information                                                                                                                                                                                                                                                                                                                                                                                                                                                                                                                                                                                                                                                                                                                                                                                                                   |                                                                                                                                                                         |                                                                           |
|------------|-------------------------------------------------------------------------------------------------------------------------------------------------------------------------------------------------------------------------------------------------------------------------------------------------------------------------------------------------------------------------------------------------------------------------------------------------------------------------------------------------------------------------------------------------------------------------------------------------------------------------------------------------------------------------------------------------------------------------------------------------------------------------------------------------------------------------------------------------|-------------------------------------------------------------------------------------------------------------------------------------------------------------------------|---------------------------------------------------------------------------|
| Serial No. | Question                                                                                                                                                                                                                                                                                                                                                                                                                                                                                                                                                                                                                                                                                                                                                                                                                                        | Options                                                                                                                                                                 | Remarks                                                                   |
| Q1         | <p><b>Consent:</b> Assalamu Alaikum/Adab (Greetings). I would like to request you to take part in a small survey. This study aims to explore the side effects of the COVID-19 vaccines in Bangladesh. The survey includes questions regarding your COVID-19 vaccination and its side effects (if any). It also includes some socio-demographic questions. I hope this information will help the Bangladesh government and policymakers to make a better vaccination strategy to fight off the COVID-19 pandemic. You will not be asked any personal or sensitive questions. You will not be asked your name/identity. The survey may take 4-5 minutes to complete. Please note that your participation in the survey is entirely voluntary. You can reject it anytime during the survey.</p> <p>Do you consent to participate in the study?</p> | <ol style="list-style-type: none"> <li>1. Yes</li> <li>2. No</li> </ol>                                                                                                 | <p>If Q1=2, then shows "Thank you for your time" and ends the survey.</p> |
| Q2         | Gender                                                                                                                                                                                                                                                                                                                                                                                                                                                                                                                                                                                                                                                                                                                                                                                                                                          | <ol style="list-style-type: none"> <li>1. Male</li> <li>2. Female</li> </ol>                                                                                            |                                                                           |
| Q3         | <p><b>(Eligibility Check)</b><br/>How old are you (in years)?</p>                                                                                                                                                                                                                                                                                                                                                                                                                                                                                                                                                                                                                                                                                                                                                                               | <ol style="list-style-type: none"> <li>1. Less than 12 years</li> <li>2. In between 12 to 17</li> <li>3. In between 18 to 29</li> <li>3. In between 30 to 39</li> </ol> | <p>If Q3=1 , then shows "Unfortunately you are not</p>                    |

|                                                                                                                                                                    |                                                                                        |                                                                                                                                                                                                                                                                                                                                                                                                                                                                                  |                                                                                      |
|--------------------------------------------------------------------------------------------------------------------------------------------------------------------|----------------------------------------------------------------------------------------|----------------------------------------------------------------------------------------------------------------------------------------------------------------------------------------------------------------------------------------------------------------------------------------------------------------------------------------------------------------------------------------------------------------------------------------------------------------------------------|--------------------------------------------------------------------------------------|
|                                                                                                                                                                    |                                                                                        | <ol style="list-style-type: none"> <li>4. In between 40 to 49</li> <li>5. In between 50 to 59</li> <li>6. In between 60 to 69</li> <li>7. 70 or above</li> </ol>                                                                                                                                                                                                                                                                                                                 | eligible to take part in this survey as you are under 12, please stop and submit it” |
| <b>Q4</b>                                                                                                                                                          | <b>(Eligibility Check)</b><br>Have you taken any Covid-19 vaccine (at least one dose)? | <ol style="list-style-type: none"> <li>1. Yes</li> <li>2. No</li> </ol>                                                                                                                                                                                                                                                                                                                                                                                                          |                                                                                      |
| <b>Q5</b>                                                                                                                                                          | Reason for not taking a vaccine yet                                                    | <ol style="list-style-type: none"> <li>1. Did registration, not yet received</li> <li>2. Did not register, willing to take</li> <li>3. I don’t want to take a vaccine</li> <li>4. I don’t know</li> <li>5. Others (specify)</li> </ol>                                                                                                                                                                                                                                           | <b>If Q4=2</b>                                                                       |
| <b>Q6</b>                                                                                                                                                          | Why don’t you want a Covid-19 vaccine?                                                 | <ol style="list-style-type: none"> <li>1. It is very difficult to manage a vaccine</li> <li>2. Vaccines aren’t safe and effective</li> <li>3. Vaccines can cause death</li> <li>4. People get infected and die even after taking the vaccines</li> <li>5. Covid-19 isn’t a serious disease, I don’t fear</li> <li>6. Only God (Allah/Vogoban) can save us</li> <li>7. I have no time to go to the Vaccine center</li> <li>8. I don’t know</li> <li>8. Other (specify)</li> </ol> | <b>If Q4=2 &amp; Q5=3</b>                                                            |
| <b>Q7</b>                                                                                                                                                          | Why didn’t you register for the Covid vaccine?                                         | <ol style="list-style-type: none"> <li>1. I don’t know how to register</li> <li>2. I don’t have access to computers/smartphones/internet</li> <li>3. I don’t know what it requires to get a vaccine</li> <li>4. I do not have my NID/BR card or lost the NID/BR</li> <li>5. Other (specify)</li> </ol>                                                                                                                                                                           | <b>If Q4=2 &amp; Q5=2</b>                                                            |
| <p><b>if Q4=2, show “Thank you for your time, unfortunately, you are not eligible to take part in this survey, please stop and submit”, otherwise continue</b></p> |                                                                                        |                                                                                                                                                                                                                                                                                                                                                                                                                                                                                  |                                                                                      |
| <b>Section B: Demographics</b>                                                                                                                                     |                                                                                        |                                                                                                                                                                                                                                                                                                                                                                                                                                                                                  |                                                                                      |

|     |                                                                                                                                                    |                                                                                                                                                                                                                                                                                                                                                                                      |  |
|-----|----------------------------------------------------------------------------------------------------------------------------------------------------|--------------------------------------------------------------------------------------------------------------------------------------------------------------------------------------------------------------------------------------------------------------------------------------------------------------------------------------------------------------------------------------|--|
| Q8  | Your marital status                                                                                                                                | <ol style="list-style-type: none"> <li>1. Single</li> <li>2. Married</li> <li>3. Widowed</li> <li>4. Divorced</li> <li>5. Other(specify)</li> </ol>                                                                                                                                                                                                                                  |  |
| Q9  | Where do you live?                                                                                                                                 | <ol style="list-style-type: none"> <li>1. Urban area (City corp, municipality)</li> <li>2. Rural area</li> </ol>                                                                                                                                                                                                                                                                     |  |
| Q10 | What is your highest completed/running level of education?                                                                                         | <ol style="list-style-type: none"> <li>1. No formal education (Illiterate)</li> <li>2. Primary completed</li> <li>3. Higher secondary (grade 6-10)</li> <li>4. SSC or equivalent completed</li> <li>5. HSC or equivalent passed</li> <li>6. Undergraduate (Hon's/MBBS/Degree/Technical or Vocational)</li> <li>7. Graduate (Maters/PhD/Mphil)</li> <li>8. Other (specify)</li> </ol> |  |
| Q11 | What is your religion?                                                                                                                             | <ol style="list-style-type: none"> <li>1. Islam</li> <li>2. Hinduism</li> <li>3. Christianity</li> <li>4. Buddhism</li> <li>5. Other religion (specify)</li> </ol>                                                                                                                                                                                                                   |  |
| Q12 | In which of the following categories would you place your monthly household income from all sources before tax and any other deductions? (in Taka) | <ol style="list-style-type: none"> <li>1. Under 10,000</li> <li>2. 10,000-19,999</li> <li>3. 20,000-29,999</li> <li>4. 30,000–39,999</li> <li>5. 40,000–49,999</li> <li>6. 50,000–74,999</li> <li>7. 75,000 or over</li> <li>8. Don't know</li> </ol>                                                                                                                                |  |
| Q13 | What is your occupational status?                                                                                                                  | <ol style="list-style-type: none"> <li>1. Service holder (govt/private/RMG)</li> <li>2. Small business (less than 5 employees)</li> <li>3. Large business (5 or more employees)</li> </ol>                                                                                                                                                                                           |  |

|                  |                                                                                   |                                                                                                                                                                                                                                                                                                                                                                                                                    |                                                                                        |
|------------------|-----------------------------------------------------------------------------------|--------------------------------------------------------------------------------------------------------------------------------------------------------------------------------------------------------------------------------------------------------------------------------------------------------------------------------------------------------------------------------------------------------------------|----------------------------------------------------------------------------------------|
|                  |                                                                                   | <ul style="list-style-type: none"> <li>4. Day laborer/Rickshaw/Van/Auto driver</li> <li>5. Motor vehicle driver</li> <li>6. Student</li> <li>7. Housewife</li> <li>8. Unemployed</li> <li>9. Retired/disabled/sick</li> <li>10. Other (specify)</li> </ul>                                                                                                                                                         |                                                                                        |
| <b>Section C</b> |                                                                                   | <b>Vaccination</b>                                                                                                                                                                                                                                                                                                                                                                                                 |                                                                                        |
| Q14              | Which Covid-19 vaccine did you take?                                              | <ul style="list-style-type: none"> <li>1. OxfordAstraZeneca (Oxford vaccine)</li> <li>2. Pfizer-BioNTech (Pfizer vaccine)</li> <li>3. Moderna</li> <li>4. Sinopharm</li> <li>5. Sinovac</li> <li>6. Johnson &amp; Johnson</li> <li>7. Sputnik V</li> <li>8. Don't know the name</li> </ul>                                                                                                                         | If Q4=1, the survey will continue. Otherwise, it will stop after the demographic part. |
| Q15              | Who/which influenced you to take the vaccine?                                     | <ul style="list-style-type: none"> <li>1. I willingly took it</li> <li>2. My family members/relatives convinced me</li> <li>3. It was compulsory for workplace/educational institution</li> <li>4. Neighbor/village leader inspired me</li> <li>5. Others (specify)</li> <li>6. Don't know</li> </ul>                                                                                                              |                                                                                        |
| <b>Section D</b> | <b>Underlying health conditions of respondents</b>                                |                                                                                                                                                                                                                                                                                                                                                                                                                    |                                                                                        |
| Q.15             | Which of the following underlying conditions do you have? (Select all that apply) | <ul style="list-style-type: none"> <li>1. No underlying conditions</li> <li>2. Diabetes</li> <li>3. Heart disease/Heart attack</li> <li>4. Hypertension/High blood pressure</li> <li>5. Low blood pressure</li> <li>6. Cancer</li> <li>7. Obesity</li> <li>8. Severe allergic problems</li> <li>9. Chronic respiratory diseases (Pneumonia, Asthma, breathing issues)</li> <li>10. Liver/kidney disease</li> </ul> |                                                                                        |

|                                                                                                           |                                                                              |                                                         |                                                            |
|-----------------------------------------------------------------------------------------------------------|------------------------------------------------------------------------------|---------------------------------------------------------|------------------------------------------------------------|
|                                                                                                           |                                                                              | 11. Anemia<br>12. Other regular health issues (specify) |                                                            |
| Q16                                                                                                       | Do you smoke                                                                 | 1. Yes<br>2. No                                         |                                                            |
| Q17                                                                                                       | Do you drink (Alcohol)/take illicit substances (Gaja/Yaba, etc.)             | 1. Yes<br>2. No                                         |                                                            |
| <b>Section E</b>                                                                                          | <b>Side effects (if Q4=1)</b>                                                |                                                         |                                                            |
|                                                                                                           |                                                                              |                                                         |                                                            |
| Q18                                                                                                       | Did you have any side effects after taking the vaccine (normal or severe)?   | 1. Yes<br>2. No                                         | If Q-18=1, then ask all the side-effects related questions |
| <b>Now we will ask you some questions about the side effects you faced after taking the covid vaccine</b> |                                                                              |                                                         |                                                            |
| Q19                                                                                                       | Pain at the vaccination site                                                 | 1. Severe pain<br>2. Normal pain<br>3. No pain          |                                                            |
| Q19.1                                                                                                     | How many days did it last (no. of days)                                      |                                                         | If Q19=1 or 2                                              |
| Q20                                                                                                       | Redness/swelling at the vaccination site<br>(ঈঞ্জেকশনের স্থানে লাল/ফুলা ভাব) | 1. Yes<br>2. No                                         |                                                            |
| Q20.1                                                                                                     | How many days did it last (no. of days)                                      |                                                         | If Q20=1                                                   |
| Q21                                                                                                       | Fever                                                                        | 1. Normal fever<br>2. Severe fever<br>3. No fever       |                                                            |
| Q21.1                                                                                                     | How many days did it last (no. of days)                                      |                                                         | If Q21=1 or 2                                              |
| Q22                                                                                                       | Headache                                                                     | 1. Yes<br>2. No                                         |                                                            |
| Q22.1                                                                                                     | How many days did it last (no. of days)                                      |                                                         | If Q22=1                                                   |
| Q23                                                                                                       | Lethargy/tiredness                                                           | 1. Yes<br>2. No                                         |                                                            |

|       |                                                        |                                                          |          |
|-------|--------------------------------------------------------|----------------------------------------------------------|----------|
| Q23.1 | How many days did it last (no. of days)                |                                                          | If Q23=1 |
| Q24   | Nausea                                                 | 1. Yes<br>2. No                                          |          |
| Q24.1 | How many days did it last (no. of days)                |                                                          | If Q24=1 |
| Q25   | Diarrhea                                               | 1. Yes<br>2. No                                          |          |
| Q25.1 | How many days did it last (no. of days)                |                                                          | If Q25=1 |
| Q26   | Cough                                                  | 1. Yes<br>2. No                                          |          |
| Q26.1 | How many days did it last (no. of days)                |                                                          | If Q26=1 |
| Q27   | Allergic reaction                                      | 1. Yes<br>2. No                                          |          |
| Q27.1 | How many days did it last (no. of days)                |                                                          | If Q27=1 |
| Q28   | Muscle pain                                            | 1. Yes<br>2. No                                          |          |
| Q28.1 | How many days did it last (no. of days)                |                                                          | If Q28=1 |
| Q29   | Abdominal Pain                                         | 1. Yes<br>2. No                                          |          |
| Q29.1 | How many days did it last (no. of days)                |                                                          | If Q29=1 |
| Q30   | Did you feel anxious after taking the vaccine?         | 1. Yes<br>2. No                                          |          |
| Q31   | Did you experience a decrease in sleep quality?        | 1. Yes<br>2. No<br>3. Don't know                         |          |
| Q32   | Did you experience an increase in sleep time?          | 1. Yes<br>2. No<br>3. Don't know                         |          |
| Q33   | Did you take any medicine (s) due to the side effects? | 1. Yes<br>2. No                                          |          |
| Q34   | How serious were the side effects of the vaccine?      | 1. Not serious, I was able to do all my usual activities |          |

|                  |                                                                                                                  |                                                                                                                                                                                                                                                                                                       |         |
|------------------|------------------------------------------------------------------------------------------------------------------|-------------------------------------------------------------------------------------------------------------------------------------------------------------------------------------------------------------------------------------------------------------------------------------------------------|---------|
|                  |                                                                                                                  | <ol style="list-style-type: none"> <li>2. I couldn't do my usual activities for 1 day</li> <li>3. I couldn't do my usual activities for more than 1 day</li> <li>4. Side effects were enough to get worried</li> <li>5. I needed to get hospitalized/see a doctor</li> <li>6. I don't know</li> </ol> |         |
| Q35              | How different were the reactions of the two doses?                                                               | <ol style="list-style-type: none"> <li>1. Yet to take the second dose</li> <li>2. Reactions after the first dose were more severe</li> <li>3. Reactions after the second dose were more severe</li> <li>4. There was no difference</li> <li>5. Don't know</li> </ol>                                  |         |
| Q36              | Has anybody discouraged you from taking the 2 <sup>nd</sup> dose because of the side effect in your first dose?  | <ol style="list-style-type: none"> <li>1. Yes</li> <li>2. No</li> </ol>                                                                                                                                                                                                                               |         |
| <b>Section F</b> | <b>Perceptions about Covid-19 and its vaccines</b>                                                               |                                                                                                                                                                                                                                                                                                       |         |
| Q37              | How safe do you think you are after getting vaccinated?                                                          | <ol style="list-style-type: none"> <li>1. 100% safe, will never get infected with Covid-19</li> <li>2. Feel safe, but still, I could get infected</li> <li>3. No confidence, I can get infected anytime</li> <li>4. Don't know</li> </ol>                                                             | If Q4=1 |
| Q38              | Covid-19 vaccines can protect you from serious COVID-19 illness (hospitalization, oxygen, ventilators, or death) | <ol style="list-style-type: none"> <li>1. Agree</li> <li>2. Neutral</li> <li>3. Disagree</li> </ol>                                                                                                                                                                                                   |         |
| Q39              | All eligible people should take Covid-19 vaccines                                                                | <ol style="list-style-type: none"> <li>1. Agree</li> <li>2. Neutral</li> <li>3. Disagree</li> </ol>                                                                                                                                                                                                   |         |

|     |                                                                                                                                  |                                                                                                         |  |
|-----|----------------------------------------------------------------------------------------------------------------------------------|---------------------------------------------------------------------------------------------------------|--|
| Q40 | Even after getting fully vaccinated, we should maintain safety protocols (wearing mask, washing hands, avoiding gatherings, etc) | <ol style="list-style-type: none"> <li>1. Agree</li> <li>2. Neutral</li> <li>3. Disagree</li> </ol>     |  |
| Q41 | Govt. and policymakers should make it mandatory for all eligible people to take a Covid-19 vaccine                               | <ol style="list-style-type: none"> <li>1. Agree</li> <li>2. Neutral</li> <li>3. Disagree</li> </ol>     |  |
| Q42 | Govt. and specialists should decide which Covid vaccine is suitable for whom (considering age, gender, health conditions, etc)   | <ol style="list-style-type: none"> <li>1. Agree</li> <li>2. Neutral</li> <li>3. Disagree</li> </ol>     |  |
| Q43 | People should have a preference in choosing which Covid vaccine to take                                                          | <ol style="list-style-type: none"> <li>1. Agree</li> <li>2. Neutral</li> <li>3. Disagree</li> </ol>     |  |
| N1  | If available, how likely are you to allow children of your family (5 or older) to take Covid vaccines?                           | <p>Not at all likely</p> <p>Somewhat likely</p> <p>Extremely likely</p>                                 |  |
| N4  | If available, how likely are you to allow older people of your family (70 or older) to take Covid vaccines?                      | <p>Not at all likely</p> <p>Somewhat likely</p> <p>Extremely likely</p>                                 |  |
| N6  | How likely are you to wear a mask when you are outside/in public transport/shops/public places?                                  | <p>Not at all likely</p> <p>Somewhat likely</p> <p>Extremely likely</p>                                 |  |
| N7  | How likely are you to recommend getting the COVID-19 vaccine to others?                                                          | <p>Not at all likely</p> <p>Somewhat likely</p> <p>Extremely likely</p>                                 |  |
| N8  | How concerned are you about getting COVID-19?                                                                                    | <p>Not at all concerned</p> <p>A little concerned</p> <p>Moderately concerned</p> <p>Very concerned</p> |  |
| N9  | How do you feel about the amount of information                                                                                  | I'm not getting enough information.                                                                     |  |



|     |                                                                                               |                                                                                                                                                                                              |              |
|-----|-----------------------------------------------------------------------------------------------|----------------------------------------------------------------------------------------------------------------------------------------------------------------------------------------------|--------------|
|     | on COVID-19 and its vaccines that you are getting?                                            | I'm getting enough information.<br>I'm getting too much information.                                                                                                                         |              |
| N10 | What are your sources of information about Covid-19 and its vaccines (select all that apply)? | Social media (facebook/instagram/twitter, etc)<br>TV/Radio/Newspaper<br>Family/Friends<br>Neighbors/Other people<br>Local health officials/Covid websites<br>WHO/CDC/FDA<br>Others (specify) |              |
| N11 | How difficult it is for general people to get Covid vaccines in Bangladesh?                   | Very easy<br>Somewhat easy<br>Somewhat difficult<br>Very difficult<br>Not sure                                                                                                               |              |
| N12 | How likely is it that Covid-19 spreads all over Bangladesh again?                             | Not at all likely<br>Somewhat likely<br>Extremely likely                                                                                                                                     |              |
| Q44 | Do you have any idea about the cost of vaccines that the government is spending               | 1.Yes<br>2.No                                                                                                                                                                                |              |
| Q45 | How much cost for each dose                                                                   |                                                                                                                                                                                              | If Q 44 is 1 |
|     |                                                                                               |                                                                                                                                                                                              |              |
